# Supplementary material for: Technical note: Flow cytometry assays for the detection, counting and cell sorting of polyphosphate-accumulating bacteria
Source: Copernicus journal article supplement (doi:10.5194/bg-22-1729-2025), 2025-04-07
Supplement: Supplementary file 1 [file bg-22-1729-2025-supplement.pdf]

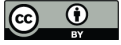

*Supplement of*

## **Technical note: Flow cytometry assays for the detection, counting and cell sorting of polyphosphate-accumulating bacteria**

**Clémentin Bouquet et al.**

*Correspondence to:* Anne-Catherine Lehours (a-catherine.lehours@uca.fr)

The copyright of individual parts of the supplement might differ from the article licence.

**Table S1 : Control of potential interference between SYTO®62 fluorochrome and isotonic buffers (HEPES, PBS, McIlvaine) in the absence of cells.**

For each condition, three replicates were performed and the number of events counted by flow cytometry was recorded. The mean and SD are the average values between replicates and the standard deviation of the mean, respectively.

| <b>Buffer</b>    | <b>replicate</b> | <b>Number of events</b> | <b>Mean</b> | <b>SD</b> |
|------------------|------------------|-------------------------|-------------|-----------|
| <b>HEPES</b>     | R1               | 5                       | 7           | 2         |
|                  | R2               | 9                       |             |           |
|                  | R3               | 7                       |             |           |
| <b>PBS</b>       | R1               | 2                       | 1           | 1         |
|                  | R2               | 0                       |             |           |
|                  | R3               | 1                       |             |           |
| <b>McIlvaine</b> | R1               | 2                       | 1           | 1         |
|                  | R2               | 1                       |             |           |
|                  | R3               | 0                       |             |           |

**Table S2 : Control of potential interference between DAPI fluorochrome and isotonic buffers (HEPES, PBS, McIlvaine) in the absence of cells.**

For each condition, three replicates were performed and the number of events counted by flow cytometry was recorded. The mean and SD are the average values between replicates and the standard deviation of the mean, respectively.

| <b>Buffer</b>    | <b>replicate</b> | <b>Number of events</b> | <b>Mean</b> | <b>SD</b> |
|------------------|------------------|-------------------------|-------------|-----------|
| <b>HEPES</b>     | R1               | 0                       | 0.7         | 1.2       |
|                  | R2               | 0                       |             |           |
|                  | R3               | 2                       |             |           |
| <b>PBS</b>       | R1               | 6                       | 2.3         | 3.2       |
|                  | R2               | 1                       |             |           |
|                  | R3               | 0                       |             |           |
| <b>McIlvaine</b> | R1               | 5204                    | 4055.7      | 2885.3    |
|                  | R2               | 6190                    |             |           |
|                  | R3               | 773                     |             |           |

**Table S3 : Staining buffer (HEPES, PBS) and labelling performance of SYTO®62 fluorochrome.**

For each condition and for each strain (the Gram negative RX and the Gram-positive TE (*T. elongata*)), three replicates were performed and the number of events counted by FCM was recorded. The mean and SD are the average values between replicates and the standard deviation of the mean, respectively.

| Strain | Buffer | replicate | Number of events | Mean   | SD    |
|--------|--------|-----------|------------------|--------|-------|
| TE     | HEPES  | R1        | 4515             | 4512.7 | 133.5 |
|        |        | R2        | 4645             |        |       |
|        |        | R3        | 4378             |        |       |
|        | PBS    | R1        | 3687             | 3593.0 | 89.8  |
|        |        | R2        | 3508             |        |       |
|        |        | R3        | 3584             |        |       |
| RX     | HEPES  | R1        | 4837             | 4779.3 | 50.7  |
|        |        | R2        | 4742             |        |       |
|        |        | R3        | 4759             |        |       |
|        | PBS    | R1        | 4429             | 4427.0 | 7.2   |
|        |        | R2        | 4433             |        |       |
|        |        | R3        | 4419             |        |       |

**Table S4 : Flow cytometry analysis of staining buffer (HEPES, PBS) versus labelling performance of DAPI fluorochrome for the strain *T. elongata*.**

For each condition, three replicates were performed. The total number of cells (Total cells) counted by FCM using the fluorescence of SYTO<sup>®</sup>62 was recorded. The number of polyP+ cells (i.e. positive green fluorescence signal regarding the fluorescence intensity limit defined by the controls) as well as the polyP- cells (i.e. negative green fluorescence signal regarding the fluorescence intensity limit defined by the controls) were counted by FCM using DAPI-green fluorescence. PolyP+ and polyP- cells were expressed as proportion (in %) of total cells. The mean and SD are the average values of the proportion of polyP+ cells between replicates and the standard deviation of the mean, respectively.

| Buffer | Replicate N° | Total cells | Cell polyP+ | % cell polyP+ | Cell polyP- | % cell polyP- | Mean % cell polyP+ | SD % cell polyP+ |
|--------|--------------|-------------|-------------|---------------|-------------|---------------|--------------------|------------------|
| HEPES  | R1           | 16946       | 14796       | 87.3          | 2150        | 12.69         | 87.5               | 0.1              |
|        | R2           | 17998       | 15758       | 87.6          | 2240        | 12.45         |                    |                  |
|        | R3           | 18040       | 15800       | 87.6          | 2240        | 12.42         |                    |                  |
| PBS    | R1           | 10014       | 8225        | 82.1          | 1789        | 17.86         | 82.3               | 0.2              |
|        | R2           | 11351       | 9349        | 82.4          | 2002        | 17.64         |                    |                  |
|        | R3           | 9822        | 8098        | 82.4          | 1724        | 17.55         |                    |                  |

**Table S5 : Epifluorescence microscopy of polyP+ cell counts after DAPI labelling for the *T. elongata* strain.**

For each condition, three replicates were performed. For each sample, 500 cells were counted. The number of polyP+ cells were counted using DAPI-green fluorescence. PolyP+ cells were expressed as proportion (in %) of total cells. The mean and SD are the average values of the proportion of polyP+ cells between replicates and the standard deviation of the mean, respectively.

| <b>Buffer</b> | <b>Replicate N°</b> | <b>Number of cell count/sample</b> | <b>Cell polyP+</b> | <b>% cell polyP+</b> | <b>Mean % cell polyP+</b> | <b>SD % cell polyP+</b> |
|---------------|---------------------|------------------------------------|--------------------|----------------------|---------------------------|-------------------------|
| <b>HEPES</b>  | R1                  | 500                                | 478                | 95.6                 | 92.5                      | 2.9                     |
|               | R2                  | 500                                | 450                | 90.0                 |                           |                         |
|               | R3                  | 500                                | 459                | 91.8                 |                           |                         |
| <b>PBS</b>    | R1                  | 500                                | 430                | 86.0                 | 87.2                      | 5.5                     |
|               | R2                  | 500                                | 412                | 82,4                 |                           |                         |
|               | R3                  | 500                                | 466                | 93,2                 |                           |                         |

**Table S6: Comparisons of the proportions of polyP+ cells counted by FCM or epifluorescence microscopy (Epi) for the *T. elongata* strain, as a function of buffer (HEPES or PBS).**

After Shapiro Wilk normality and Brown-Forsythe homoscedasticity tests, the similarities between treatments were evaluated using a one-way ANOVA, with Tukey's post-hoc test to make multiple comparisons between the groups. A  $p$  value of less than 0.05 ( $p < 0.05$ ) was considered as statistically significant. ns: not significant, \*  $p < 0.05$ .

| Comparison test         | Summary | Adjusted p Value |
|-------------------------|---------|------------------|
| HEPES FCM vs. PBS FCM   | ns      | 0.2463           |
| HEPES FCM vs. HEPES Epi | ns      | 0.2775           |
| HEPES FCM vs. PBS Epi   | ns      | 0.9994           |
| PBS FCM vs. HEPES Epi   | *       | 0.0163           |
| PBS FCM vs. PBS Epi     | ns      | 0.287            |
| HEPES Epi vs. PBS Epi   | ns      | 0.2379           |

**Table S7 : Flow cytometry analysis of staining buffer (HEPES, PBS) versus labelling performance of DAPI fluorochrome for the strain RX.**

For each condition, three replicates were performed. The total number of cells (Total cells) counted by FCM using the fluorescence of SYTO<sup>®</sup>62 was recorded. The number of polyP+ cells (i.e. positive green fluorescence signal regarding the fluorescence intensity limit defined by the controls) as well as the polyP- cells (i.e. negative green fluorescence signal regarding the fluorescence intensity limit defined by the controls) were counted by FCM using DAPI-green fluorescence. PolyP+ and polyP- cells were expressed as proportion (in %) of total cells. The mean and SD are the average values of the proportion of polyP+ cells between replicates and the standard deviation of the mean, respectively.

| Buffer | Replicate N° | Total cells | Cell polyP+ | % cell polyP+ | Cell polyP- | % cell polyP- | Mean % cell polyP+ | SD % cell polyP+ |
|--------|--------------|-------------|-------------|---------------|-------------|---------------|--------------------|------------------|
| HEPES  | R1           | 34258       | 34230       | 99.9          | 28          | 0.1           | 99.9               | 0.0              |
|        | R2           | 60437       | 60372       | 99.9          | 65          | 0.1           |                    |                  |
|        | R3           | 67443       | 67382       | 99.9          | 61          | 0.1           |                    |                  |
| PBS    | R1           | 23428       | 2103        | 9             | 21325       | 90.9          | 7.2                | 1.7              |
|        | R2           | 12787       | 716         | 5.6           | 12071       | 94.3          |                    |                  |
|        | R3           | 37143       | 2601        | 7             | 34542       | 92.9          |                    |                  |



**Table S8 : Epifluorescence microscopy of polyP+ cell counts after DAPI labelling for the RX strain.**

For each condition, three replicates were performed. For each sample, 500 cells were counted. The number of polyP+ cells were counted using DAPI-green fluorescence. PolyP+ cells were expressed as proportion (in %) of total cells. The mean and SD are the average values of the proportion of polyP+ cells between replicates and the standard deviation of the mean, respectively.

| <b>Buffer</b> | <b>Replicate N°</b> | <b>Number of cell count/sample</b> | <b>Cell polyP+</b> | <b>% cell polyP+</b> | <b>Mean % cell polyP+</b> | <b>SD % cell polyP+</b> |
|---------------|---------------------|------------------------------------|--------------------|----------------------|---------------------------|-------------------------|
| <b>HEPES</b>  | R1                  | 500                                | 10                 | 2.0                  | 1.9                       | 1.0                     |
|               | R2                  | 500                                | 14                 | 2.8                  |                           |                         |
|               | R3                  | 500                                | 4                  | 0.8                  |                           |                         |
| <b>PBS</b>    | R1                  | 500                                | 2                  | 0.4                  | 0.9                       | 0.5                     |
|               | R2                  | 500                                | 6                  | 1.2                  |                           |                         |
|               | R3                  | 500                                | 6                  | 1.2                  |                           |                         |

**Table S9: Comparisons of the proportions of polyP+ cells counted by FCM or epifluorescence microscopy (Epi) for the RX strain, as a function of buffer (HEPES or PBS).**

After Shapiro Wilk normality and Brown-Forsythe homoscedasticity tests, the similarities between treatments were evaluated using a one-way ANOVA, with Tukey's post-hoc test to make multiple comparisons between the groups. A  $p$  value of less than 0.05 ( $p < 0.05$ ) was considered as statistically significant. ns: not significant, \*\*\* $p < 0.0005$ , and \*\*\*\* $p < 0.0001$ .

| <b>Comparison test</b>  | <b>Summary</b> | <b>Adjusted P Value</b> |
|-------------------------|----------------|-------------------------|
| HEPES FCM vs. PBS FCM   | ****           | <0.0001                 |
| HEPES FCM vs. HEPES Epi | ****           | <0.0001                 |
| HEPES FCM vs. PBS Epi   | ****           | <0.0001                 |
| PBS FCM vs. HEPES Epi   | ***            | 0.0009                  |
| PBS FCM vs. PBS Epi     | ***            | 0.0003                  |
| HEPES Epi vs. PBS Epi   | ns             | 0.6869                  |

**Table S10 : Number of cells counted by FCM after SYTO®62 labelling according to whether or not treated with a detergent, Triton X100, for *T. elongata* (TE) and RX culture strains.**

For each condition, three replicates were performed. The total number of cells counted by FCM using the fluorescence of SYTO®62 was recorded. The mean and SD are the average values of the number of cells between replicates and the standard deviation of the mean, respectively.

| Strain | Buffer | replicate<br>N° | Triton<br>X100 | Number of cells | Mean  | SD   |
|--------|--------|-----------------|----------------|-----------------|-------|------|
| TE     | PBS    | 1               | 0 %            | 80751           |       |      |
| TE     | PBS    | 2               | 0 %            | 84744           | 77583 | 9165 |
| TE     | PBS    | 3               | 0 %            | 67254           |       |      |
| TE     | PBS    | 1               | 0.3 %          | 46794           |       |      |
| TE     | PBS    | 2               | 0.3 %          | 42933           | 43538 | 3000 |
| TE     | PBS    | 3               | 0.3 %          | 40887           |       |      |
| RX     | PBS    | 1               | 0 %            | 17289           |       |      |
| RX     | PBS    | 2               | 0 %            | 17655           | 17423 | 202  |
| RX     | PBS    | 3               | 0 %            | 17325           |       |      |
| RX     | PBS    | 1               | 0.3 %          | 7002            |       |      |
| RX     | PBS    | 2               | 0.3 %          | 6278            | 6496  | 440  |
| RX     | PBS    | 3               | 0.3 %          | 6208            |       |      |

**Table S11 : Effect of 2 % or 4 % formaldehyde fixation on the FCM count of total cells (after SYTO<sup>®</sup>62 labelling) and proportion of polyP+ cells (after DAPI labelling) of the RX strain as a function of storage temperature (4 °C, -20 °C, -80 °C) and storage duration (0, 2, 7 and 14 days). The mean and SD are the average values of the number of cells between replicates and the standard deviation of the mean, respectively.**

| Day | Storage Temperature | Formaldehyde concentration | Total cell | Proportion PolyP+ cell | Mean total cell | SD total cell | Mean Polyp+ cell | SD PolyP+ cell |
|-----|---------------------|----------------------------|------------|------------------------|-----------------|---------------|------------------|----------------|
| 0   | 0 %                 | R1                         | 43042      | 13.7                   | 41879.7         | 1985.6        | 14.2             | 0.6            |
|     |                     | R2                         | 39587      | 14.1                   |                 |               |                  |                |
|     |                     | R3                         | 43010      | 14.9                   |                 |               |                  |                |
|     | 2 %                 | R1                         | 54031      | 8.2                    | 64634.3         | 9343.9        | 7.5              | 0.7            |
|     |                     | R2                         | 68208      | 7.4                    |                 |               |                  |                |
|     |                     | R3                         | 71664      | 6.8                    |                 |               |                  |                |
|     | 4 %                 | R1                         | 42442      | 8.9                    | 42043.3         | 1306.4        | 8.9              | 0.0            |
|     |                     | R2                         | 43104      | 8.9                    |                 |               |                  |                |
|     |                     | R3                         | 40584      | 8.9                    |                 |               |                  |                |
| 2   | 4 °C                | R1                         | 50938      | 7.3                    | 56979.0         | 8597.5        | 6.9              | 0.6            |
|     |                     | R2                         | 66822      | 6.3                    |                 |               |                  |                |
|     |                     | R3                         | 53177      | 7.2                    |                 |               |                  |                |
|     | 4 %                 | R1                         | 25209      | 8                      | 20312.7         | 4573.8        | 8.8              | 0.7            |
|     |                     | R2                         | 19579      | 9                      |                 |               |                  |                |
|     |                     | R3                         | 16150      | 9.4                    |                 |               |                  |                |
|     | -20 °C              | R1                         | 59572      | 4.5                    | 61609.3         | 5960.1        | 4.7              | 0.9            |
|     |                     | R2                         | 56935      | 5.7                    |                 |               |                  |                |
|     |                     | R3                         | 68321      | 3.9                    |                 |               |                  |                |
|     | 4 %                 | R1                         | 27593      | 5.6                    | 24269.0         | 2900.4        | 6.9              | 1.2            |
|     |                     | R2                         | 22961      | 7.3                    |                 |               |                  |                |
|     |                     | R3                         | 22253      | 7.9                    |                 |               |                  |                |
|     | -80 °C              | R1                         | 47789      | 0.5                    | 49866.3         | 2498.0        | 0.7              | 0.5            |
|     |                     | R2                         | 49172      | 0.4                    |                 |               |                  |                |
|     |                     | R3                         | 52638      | 1.3                    |                 |               |                  |                |
|     | 4 %                 | R1                         | 23645      | 1.2                    | 23829.7         | 1709.5        | 1.1              | 0.3            |
|     |                     | R2                         | 25624      | 1.3                    |                 |               |                  |                |
|     |                     | R3                         | 22220      | 0.8                    |                 |               |                  |                |
| 7   | 4 °C                | R1                         | 47140      | 7.4                    | 49258.0         | 1921.1        | 7.1              | 0.3            |
|     |                     | R2                         | 49746      | 7.1                    |                 |               |                  |                |
|     |                     | R3                         | 50888      | 6.8                    |                 |               |                  |                |
|     | 4 %                 | R1                         | 21974      | 8.6                    | 21161.7         | 1680.8        | 8.2              | 0.3            |
|     |                     | R2                         | 22282      | 8                      |                 |               |                  |                |
|     |                     | R3                         | 19229      | 8                      |                 |               |                  |                |
|     | -20 °C              | R1                         | 57275      | 2.5                    | 52431.3         | 4487.2        | 2.4              | 0.1            |
|     |                     | R2                         | 48416      | 2.4                    |                 |               |                  |                |
|     |                     | R3                         | 51603      | 2.4                    |                 |               |                  |                |
|     | 4 %                 | R1                         | 21598      | 2                      | 19598.0         | 2340.4        | 3.7              | 2.4            |
|     |                     | R2                         | 17024      | 2.6                    |                 |               |                  |                |
|     |                     | R3                         | 20172      | 6.4                    |                 |               |                  |                |
|     | -80 °C              | R1                         | 51861      | 0                      | 50767.0         | 1141.7        | 0.0              | 0.0            |
|     |                     | R2                         | 50857      | 0                      |                 |               |                  |                |
|     |                     | R3                         | 49583      | 0                      |                 |               |                  |                |
|     | 4 %                 | R1                         | 27205      | 1.1                    | 27086.0         | 524.7         | 0.8              | 0.2            |
|     |                     | R2                         | 27541      | 0.7                    |                 |               |                  |                |
|     |                     | R3                         | 26512      | 0.7                    |                 |               |                  |                |
| 14  | 4 °C                | R1                         | 82800      | 5.2                    | 61929.0         | 20558.9       | 5.7              | 0.5            |
|     |                     | R2                         | 61290      | 6.2                    |                 |               |                  |                |
|     |                     | R3                         | 41697      | 5.8                    |                 |               |                  |                |
|     | 4 %                 | R1                         | 14788      | 6.1                    | 14779.7         | 196.6         | 5.9              | 0.2            |
|     |                     | R2                         | 14972      | 6                      |                 |               |                  |                |
|     |                     | R3                         | 14579      | 5.7                    |                 |               |                  |                |
|     | -20 °C              | R1                         | 61175      | 2.4                    | 63893.0         | 2363.7        | 1.6              | 0.8            |
|     |                     | R2                         | 65036      | 0.8                    |                 |               |                  |                |
|     |                     | R3                         | 65468      | 1.7                    |                 |               |                  |                |
|     | 4 %                 | R1                         | 13444      | 3.4                    | 9375.0          | 3644.4        | 5.1              | 1.8            |
|     |                     | R2                         | 8270       | 7                      |                 |               |                  |                |
|     |                     | R3                         | 6411       | 5                      |                 |               |                  |                |
|     | -80 °C              | R1                         | 67649      | 0                      | 63707.0         | 3828.6        | 0.0              | 0.0            |
|     |                     | R2                         | 63469      | 0                      |                 |               |                  |                |
|     |                     | R3                         | 60003      | 0                      |                 |               |                  |                |
| 4 % | R1                  | 12239                      | 0.9        | 9954.3                 | 2029.1          | 0.9           | 0.1              |                |
|     | R2                  | 9262                       | 0.8        |                        |                 |               |                  |                |
|     | R3                  | 8362                       | 0.9        |                        |                 |               |                  |                |

**Table S12 : Comparisons of the proportions of polyP+ cells counted by FCM for the RX strain, as a function of formaldehyde concentration (2 % or 4 %) after 1h of incubation (day 0).**

After Shapiro Wilk normality and Brown- Forsythe homoscedasticity tests, the similarities between treatments were evaluated using a one-way ANOVA with Tukey's post-hoc test to make multiple comparisons between the groups. A  $p$  value of less than 0.05 ( $p < 0.05$ ) was considered as statistically significant: \* $p < 0.05$ , \*\*\*\* $p < 0.0001$ .

| Comparison test | Summary | Adjusted P Value |
|-----------------|---------|------------------|
| 0 % vs. 2 %     | ****    | <0.0001          |
| 0 % vs. 4 %     | ****    | <0.0001          |
| 2 % vs. 4 %     | *       | 0,0393           |

**Table S13 : Effect of 2 % or 4 % formaldehyde fixation on the FCM count of total cells (after SYTO®62 labelling) and proportion of polyP+ cells (after DAPI labelling) of the *T. elongata* strain as a function of storage temperature (4 °C, -20 °C, -80 °C) and storage duration (0, 2, 7 and 14 days). The mean and SD are the average values of the number of cells between replicates and the standard deviation of the mean, respectively.**

| Day | Storage Temperature | Formaldehyde concentration |    | Total cell | Proportion PolyP+ cell | Mean total cell | SD total cell | Mean Polyp+ cell | SD PolyP+ cell |
|-----|---------------------|----------------------------|----|------------|------------------------|-----------------|---------------|------------------|----------------|
| 0   | 0 %                 |                            | R1 | 30893      | 99.9                   | 32963.3         | 2061.6        | 99.8             | 0.2            |
|     |                     |                            | R2 | 32981      | 99.6                   |                 |               |                  |                |
|     |                     |                            | R3 | 35016      | 99.8                   |                 |               |                  |                |
|     | 2 %                 |                            | R1 | 27492      | 99.9                   | 26664.0         | 803.7         | 99.9             | 0.1            |
|     |                     |                            | R2 | 25887      | 99.9                   |                 |               |                  |                |
|     |                     |                            | R3 | 26613      | 100                    |                 |               |                  |                |
|     | 4 %                 |                            | R1 | 22716      | 99.8                   | 22235.3         | 594.2         | 99.9             | 0.1            |
|     |                     |                            | R2 | 22419      | 100                    |                 |               |                  |                |
|     |                     |                            | R3 | 21571      | 100                    |                 |               |                  |                |
| 2   | 4 °C                | 2 %                        | R1 | 26090      | 100                    | 25308.0         | 2136.2        | 100.0            | 0.0            |
|     |                     |                            | R2 | 22891      | 100                    |                 |               |                  |                |
|     |                     |                            | R3 | 26943      | 100                    |                 |               |                  |                |
|     |                     | 4 %                        | R1 | 24569      | 100                    | 19954.7         | 4114.4        | 99.9             | 0.1            |
|     |                     |                            | R2 | 16668      | 99.9                   |                 |               |                  |                |
|     |                     |                            | R3 | 18627      | 99.9                   |                 |               |                  |                |
|     | -20 °C              | 2 %                        | R1 | 28097      | 99.9                   | 23267.3         | 4183.4        | 99.9             | 0.1            |
|     |                     |                            | R2 | 20769      | 99.9                   |                 |               |                  |                |
|     |                     |                            | R3 | 20936      | 100                    |                 |               |                  |                |
|     |                     | 4 %                        | R1 | 20571      | 100                    | 21258.3         | 603.4         | 100.0            | 0.0            |
|     |                     |                            | R2 | 21701      | 100                    |                 |               |                  |                |
|     |                     |                            | R3 | 21503      | 100                    |                 |               |                  |                |
|     | -80 °C              | 2 %                        | R1 | 32515      | 100                    | 28515.0         | 3472.8        | 100.0            | 0.1            |
|     |                     |                            | R2 | 26269      | 100                    |                 |               |                  |                |
|     |                     |                            | R3 | 26761      | 99.9                   |                 |               |                  |                |
|     |                     | 4 %                        | R1 | 20737      | 100                    | 20834.7         | 879.6         | 100.0            | 0.0            |
|     |                     |                            | R2 | 20008      | 100                    |                 |               |                  |                |
|     |                     |                            | R3 | 21759      | 100                    |                 |               |                  |                |
| 7   | 4 °C                | 2 %                        | R1 | 24763      | 100                    | 23809.0         | 839.0         | 100.0            | 0.1            |
|     |                     |                            | R2 | 23478      | 99.9                   |                 |               |                  |                |
|     |                     |                            | R3 | 23186      | 100                    |                 |               |                  |                |
|     |                     | 4 %                        | R1 | 21056      | 99.9                   | 20997.0         | 424.6         | 99.9             | 0.1            |
|     |                     |                            | R2 | 21389      | 99.9                   |                 |               |                  |                |
|     |                     |                            | R3 | 20546      | 100                    |                 |               |                  |                |
|     | -20 °C              | 2 %                        | R1 | 25989      | 100                    | 21013.7         | 5925.7        | 100.0            | 0.0            |
|     |                     |                            | R2 | 22594      | 100                    |                 |               |                  |                |
|     |                     |                            | R3 | 14458      | 100                    |                 |               |                  |                |
|     |                     | 4 %                        | R1 | 12194      | 100                    | 14729.0         | 4993.9        | 100.0            | 0.1            |
|     |                     |                            | R2 | 20482      | 100                    |                 |               |                  |                |
|     |                     |                            | R3 | 11511      | 99.9                   |                 |               |                  |                |
|     | -80 °C              | 2 %                        | R1 | 25500      | 99.9                   | 24924.3         | 1463.1        | 99.9             | 0.0            |
|     |                     |                            | R2 | 23261      | 99.9                   |                 |               |                  |                |
|     |                     |                            | R3 | 26012      | 99.9                   |                 |               |                  |                |
|     |                     | 4 %                        | R1 | 19327      | 99.8                   | 20358.7         | 2374.0        | 99.8             | 0.0            |
|     |                     |                            | R2 | 18675      | 99.8                   |                 |               |                  |                |
|     |                     |                            | R3 | 23074      | 99.8                   |                 |               |                  |                |
| 14  | 4 °C                | 2 %                        | R1 | 26665      | 99.9                   | 23495.3         | 2753.0        | 99.9             | 0.1            |
|     |                     |                            | R2 | 21701      | 100                    |                 |               |                  |                |
|     |                     |                            | R3 | 22120      | 99.9                   |                 |               |                  |                |
|     |                     | 4 %                        | R1 | 21575      | 100                    | 20357.3         | 1056.3        | 100.0            | 0.1            |
|     |                     |                            | R2 | 19809      | 99.9                   |                 |               |                  |                |
|     |                     |                            | R3 | 19688      | 100                    |                 |               |                  |                |
|     | -20 °C              | 2 %                        | R1 | 10429      | 99.9                   | 11354.0         | 823.9         | 99.9             | 0.1            |
|     |                     |                            | R2 | 11624      | 99.9                   |                 |               |                  |                |
|     |                     |                            | R3 | 12009      | 100                    |                 |               |                  |                |
|     |                     | 4 %                        | R1 | 16583      | 100                    | 15514.0         | 7654.7        | 99.9             | 0.1            |
|     |                     |                            | R2 | 7381       | 99.9                   |                 |               |                  |                |
|     |                     |                            | R3 | 22578      | 99.9                   |                 |               |                  |                |
|     | -80 °C              | 2 %                        | R1 | 24925      | 100                    | 26944.7         | 1767.5        | 100.0            | 0.1            |
|     |                     |                            | R2 | 27700      | 100                    |                 |               |                  |                |
|     |                     |                            | R3 | 28209      | 99.9                   |                 |               |                  |                |
|     |                     | 4 %                        | R1 | 23471      | 100                    | 23100.7         | 916.5         | 99.9             | 0.1            |
|     |                     |                            | R2 | 23774      | 99.9                   |                 |               |                  |                |
|     |                     |                            | R3 | 22057      | 99.8                   |                 |               |                  |                |

**Table S14 : Comparisons of the proportions of polyP+ cells counted by FCM for the *T. elongata* strain, as a function of formaldehyde concentration (2% or 4%) after 1h of incubation (day 0).**

After Shapiro Wilk normality and Brown-Forsythe homoscedasticity tests, the similarities between treatments were evaluated using a one-way ANOVA with Tukey's post-hoc test to make multiple comparisons between the groups. A  $p$  value of less than 0.05 ( $p < 0.05$ ) was considered as statistically significant. ns: not significant.

| <b>Anova Summary</b> | <b>F</b>     | <b>P. value</b> | <b>P. value</b> |
|----------------------|--------------|-----------------|-----------------|
| ns                   | <b>2.083</b> | 0.2056          | 0.0625          |

**Table S15 : Comparisons of the proportions of polyP+ cells counted by FCM for the *T. elongata* strain, as a function of storage duration (2, 7, 17 days) and temperature (4 °C, -20 °C, -80 °C).**

After Shapiro Wilk normality and Brown-Forsythe homoscedasticity tests, the similarities between treatments were evaluated using two-way repeated measures Anova test, with Tukey's post-hoc test to make multiple comparisons between the groups. A *p* value of less than 0.05 ( $p < 0.05$ ) was considered as statistically significant. ns: not significant.

| Anova source of variation | Summary | Adjusted P Value |
|---------------------------|---------|------------------|
| <b>2 % formaldéhyde</b>   |         |                  |
| Interaction               | ns      | 0.0625           |
| Duration                  | ns      | 0.4854           |
| Temperature               | ns      | 0.7023           |



**Table S16 : Comparisons of the proportions of polyP+ cells counted by FCM for the RX strain, as a function of storage temperature (4 °C, -20 °C, -80 °C).**

After Shapiro Wilk normality and Brown-Forsythe homoscedasticity tests, the similarities between treatments were evaluated using two-way repeated measures Anova test, with Tukey's post-hoc test to make multiple comparisons between the groups. A  $p$  value of less than 0.05 ( $p < 0.05$ ) was considered as statistically significant. ns: not significant, \* $p < 0.05$ , \*\* $p < 0.001$ , \*\*\* $p < 0.0005$ , and \*\*\*\* $p < 0.0001$ .

| Comparison test                        | Summary | Adjusted P Value |
|----------------------------------------|---------|------------------|
| <b>After 2 days- 2% formaldéhyde</b>   |         |                  |
| 4 °C vs. -20 °C                        | ns      | 0.0637           |
| 4 °C vs. -80 °C                        | ***     | 0.0003           |
| -20 °C vs. -80 °C                      | *       | 0.0135           |
| <b>After 7 days- 2 % formaldéhyde</b>  |         |                  |
| 4 °C vs. -20 °C                        | **      | 0.0012           |
| 4 °C vs. -80 °C                        | ***     | 0.0001           |
| -20 °C vs. -80 °C                      | ****    | <0.0001          |
| <b>After 14 days- 2 % formaldéhyde</b> |         |                  |
| 4 °C vs. -20 °C                        | **      | 0.0069           |
| 4 °C vs. -80 °C                        | **      | 0.0044           |
| -20 °C vs. -80 °C                      | ns      | 0.128            |

| Comparison test                        | Summary | Adjusted P Value |
|----------------------------------------|---------|------------------|
| <b>After 2 days- 4 % formaldéhyde</b>  |         |                  |
| 4 °C vs. -20 °C                        | ns      | 0.1848           |
| 4 °C vs. -80 °C                        | **      | 0.0022           |
| -20 °C vs. -80 °C                      | *       | 0.0201           |
| <b>After 7 days- 4 % formaldéhyde</b>  |         |                  |
| 4 °C vs. -20 °C                        | ns      | 0.1405           |
| 4 °C vs. -80 °C                        | ****    | <0.0001          |
| -20 °C vs. -80 °C                      | ns      | 0.3004           |
| <b>After 14 days- 4 % formaldéhyde</b> |         |                  |
| 4 °C vs. -20 °C                        | ns      | 0.7566           |
| 4 °C vs. -80 °C                        | ****    | <0.0001          |
| -20 °C vs. -80 °C                      | ns      | 0.0979           |

**Table S17 : Comparisons of the proportions of polyP+ cells counted by FCM for the RX strain, as a function of storage duration (2, 7, 14 days).**

After Shapiro Wilk normality and Brown-Forsythe homoscedasticity tests, the similarities between treatments were evaluated using two-way repeated measures Anova test, with Tukey's post-hoc test to make multiple comparisons between the groups. A  $p$  value of less than 0.05 ( $p < 0.05$ ) was considered as statistically significant. ns: not significant,  $**p < 0.001$ .

| Comparison test                     | Summary | Adjusted P Value |
|-------------------------------------|---------|------------------|
| <b>4 °C- 2 %<br/>formaldéhyde</b>   |         |                  |
| 2 days vs 7 days                    | ns      | 0.8878           |
| 2 days vs 14 days                   | ns      | 0.303            |
| 7 days vs 14 days                   | ns      | 0.1456           |
| <b>-20 °C- 2 %<br/>formaldéhyde</b> |         |                  |
| 2 days vs 7 days                    | ns      | 0.0928           |
| 2 days vs 14 days                   | ns      | 0.1403           |
| 7 days vs 14 days                   | ns      | 0.3511           |
| <b>-80 °C- 2 %<br/>formaldéhyde</b> |         |                  |
| 2 days vs 7 days                    | ns      | -                |
| 2 days vs 14 days                   | ns      | -                |
| 7 days vs 14 days                   | ns      | -                |

| Comparison test                     | Summary | Adjusted P Value |
|-------------------------------------|---------|------------------|
| <b>4 °C- 4 %<br/>formaldéhyde</b>   |         |                  |
| 2 days vs 7 days                    | ns      | 0.6535           |
| 2 days vs 14 days                   | ns      | 0.0575           |
| 7 days vs 14 days                   | **      | 0.0074           |
| <b>-20 °C- 4 %<br/>formaldéhyde</b> |         |                  |
| 2 days vs 7 days                    | ns      | 0.131            |
| 2 days vs 14 days                   | ns      | 0.2535           |
| 7 days vs 14 days                   | ns      | 0.7033           |
| <b>-80 °C- 4 %<br/>formaldéhyde</b> |         |                  |
| 2 days vs 7 days                    | ns      | 0.4157           |
| 2 days vs 14 days                   | ns      | 0.5099           |
| 7 days vs 14 days                   | ns      | 0.9593           |

**Table S18 : PolyP+ cell counts by epifluorescence microscopy and FCM after DAPI labelling before and after cell sorting for the mixed RX and *T. elongata* strains.**

For each condition, three replicates were counted in epifluorescence microscopy. The total number of cells counted by FCM using the fluorescence of SYTO®62 was recorded. The mean and SD are the average values of the percentage of polyP+ cells between replicates and the standard deviation of the mean, respectively.

| Method                     | Condition                          | Replicate N° | Number of cell count/sample | Cell polyP+ | % cell polyP+ | Mean % cell polyP+ | SD % cell polyP+ |
|----------------------------|------------------------------------|--------------|-----------------------------|-------------|---------------|--------------------|------------------|
| Epifluorescence microscopy | Before cell sorting                | R1           | 500                         | 93          | 18.6          | 12.6               | 7.5              |
|                            |                                    | R2           | 500                         | 75          | 15.0          |                    |                  |
|                            |                                    | R3           | 500                         | 21          | 4.2           |                    |                  |
|                            | After cell sorting-fraction polyP+ | R1           | 200                         | 186         | 93.0          | 93.3               | 1.0              |
|                            |                                    | R2           | 200                         | 189         | 94.5          |                    |                  |
|                            |                                    | R3           | 200                         | 185         | 92.5          |                    |                  |
|                            | After cell sorting-fraction polyP- | R1           | 200                         | 13          | 6.5           | 12.2               | 6.3              |
|                            |                                    | R2           | 200                         | 38          | 19.0          |                    |                  |
|                            |                                    | R3           | 200                         | 22          | 11.0          |                    |                  |
| FCM                        | Before cell sorting                |              | 57672                       | 21070       | 36.5          |                    |                  |
|                            | After cell sorting-fraction polyP+ |              | 7116                        | 5631        | 79.1          |                    |                  |
|                            | After cell sorting-fraction polyP- |              | 689                         | 18          | 2.6           |                    |                  |

**Table S19 : PAB cell sorting from lake water sample**

Proportion of polyP+ cells, after PAB labelling with DAPI and SYTO®62, in a water sample from Lake Pavin. Cells were counted by epifluorescence microscopy in the sample before fluorescence activated cell sorting and, in the polyP, + and polyP- fractions after cell sorting.

For each condition, three replicates were counted in epifluorescence microscopy. The mean and SD are the average values of the percentage of polyP+ cells between replicates and the standard deviation of the mean, respectively.

For comparison test t-test of Student. A *p* value of less than 0.05 ( $p < 0.05$ ) was considered as statistically significant. ns: not significant, \*\*\*\* $p < 0.0001$ .

| Condition                                 | Replicate N° | Number of cell count/sample | Cell polyP+ | % cell polyP+ | Mean % cell polyP+ | SD % cell polyP+ |
|-------------------------------------------|--------------|-----------------------------|-------------|---------------|--------------------|------------------|
| <b>Before cell sorting</b>                | R1           | 500                         | 57          | 11.4          | 9.7                | 1.5              |
|                                           | R2           | 500                         | 44          | 8.8           |                    |                  |
|                                           | R3           | 500                         | 44          | 8.8           |                    |                  |
| <b>After cell sorting-fraction polyP+</b> | R1           | 200                         | 105         | 52.5          | 52.0               | 1.8              |
|                                           | R2           | 200                         | 100         | 50.0          |                    |                  |
|                                           | R3           | 200                         | 107         | 53.5          |                    |                  |
| <b>After cell sorting-fraction polyP-</b> | R1           | 200                         | 11          | 5.5           | 5.5                | 3.0              |
|                                           | R2           | 200                         | 5           | 2,5           |                    |                  |
|                                           | R3           | 200                         | 17          | 8,5           |                    |                  |

| Comparison test                        | Summary | Adjusted P Value |
|----------------------------------------|---------|------------------|
| Before cell sorting vs polyP+ fraction | ****    | <0.0001          |
| Before cell sorting vs polyP- fraction | ns      | 0.0978           |

**Table S20 : PolyP+ cell counts after DAPI or JC-D7 labelling for the *T. elongata* strain.**

For each condition, three replicates were counted in FCM or epifluorescence microscopy. The mean and SD are the average values of the percentage of polyP+ cells between replicates and the standard deviation of the mean, respectively.

For comparison test: after Shapiro Wilk normality and Brown-Forsythe homoscedasticity tests, the similarities between treatments were evaluated using a one-way ANOVA with Tukey's post-hoc test to make multiple comparisons between the groups. A *p* value of less than 0.05 ( $p < 0.05$ ) was considered as statistically significant. ns: not significant, \* $p < 0.05$ , \*\* $p < 0.001$ .

|                                          | Replicate<br>N° | Number of<br>cell<br>count/sample | Cell<br>polyP+ | % cell<br>polyP+ | Mean %<br>cell polyP+ | SD % cell<br>polyP+ |
|------------------------------------------|-----------------|-----------------------------------|----------------|------------------|-----------------------|---------------------|
| <b>Epifluorescence microscopy counts</b> | R1              | 1000                              | 947            | 94.70            | 96.3                  | 1.9                 |
|                                          | R2              | 1000                              | 984            | 98.40            |                       |                     |
|                                          | R3              | 1000                              | 958            | 95.80            |                       |                     |
| <b>FCM counts-DAPI labelling</b>         | R1              | 11107                             | 11096          | 99.90            | 99.9                  | 0.0                 |
|                                          | R2              | 10719                             | 10712          | 99.93            |                       |                     |
|                                          | R3              | 10832                             | 10823          | 99.92            |                       |                     |
| <b>FCM counts-JC-D7 labelling</b>        | R1              | 9274                              | 8809           | 94.99            | 93.7                  | 1.5                 |
|                                          | R2              | 8441                              | 7772           | 92.07            |                       |                     |
|                                          | R3              | 9434                              | 8862           | 93.94            |                       |                     |

| Comparison test                     | Summary | Adjusted P Value |
|-------------------------------------|---------|------------------|
| Epifluorescence counts vs FCM DAPI  | *       | 0.0433           |
| Epifluorescence counts vs FCM JC-D7 | ns      | 0.1284           |
| FCM DAPI vs FCM JC-D7               | **      | 0.0036           |

**Table S21 : PolyP+ cell counts after DAPI or JC-D7 labelling for the RX strain.**

For each condition, three replicates were counted in FCM or epifluorescence microscopy. The mean and SD are the average values of the percentage of polyP+ cells between replicates and the standard deviation of the mean, respectively.

For comparison test: after Shapiro Wilk normality and Brown-Forsythe homoscedasticity tests, the similarities between treatments were evaluated using a one-way ANOVA with Tukey's post-hoc test to make multiple comparisons between the groups. A  $p$  value of less than 0.05 ( $p < 0.05$ ) was considered as statistically significant. ns: not significant, \*\*\* $p < 0.0005$ , and \*\*\*\* $p < 0.0001$ .

|                                          | Replicate N° | Number of cell count/sample | Cell polyP+ | % cell polyP+ | Mean % cell polyP+ | SD % cell polyP+ |
|------------------------------------------|--------------|-----------------------------|-------------|---------------|--------------------|------------------|
| <b>Epifluorescence microscopy counts</b> | R1           | 1000                        | 132         | 13.2          | 12.3               | 1.2              |
|                                          | R2           | 1000                        | 109         | 10.9          |                    |                  |
|                                          | R3           | 1000                        | 127         | 12.7          |                    |                  |
| <b>FCM counts-DAPI labelling</b>         | R1           | 19437                       | 1178        | 6.1           | 5.8                | 0.5              |
|                                          | R2           | 21846                       | 1341        | 6.1           |                    |                  |
|                                          | R3           | 19833                       | 1034        | 5.2           |                    |                  |
| <b>FCM counts-JC-D7 labelling</b>        | R1           | 3617                        | 170         | 4.7           | 4.8                | 0.3              |
|                                          | R2           | 4472                        | 205         | 4.6           |                    |                  |
|                                          | R3           | 3829                        | 198         | 5.2           |                    |                  |

| Comparison test                     | Summary | Adjusted P Value |
|-------------------------------------|---------|------------------|
| Epifluorescence counts vs FCM DAPI  | ***     | 0.0001           |
| Epifluorescence counts vs FCM JC-D7 | ****    | <0.0001          |
| FCM DAPI vs FCM JC-D7               | ns      | 0.3501           |

**Table S22 : PolyP+ cell counts after DAPI or JC-D7 labelling for the lake sediment sample.**

For each condition, three replicates were counted in FCM or epifluorescence microscopy. The mean and SD are the average values of the percentage of polyP+ cells between replicates and the standard deviation of the mean, respectively.

For comparison test: after Shapiro Wilk normality and Brown-Forsythe homoscedasticity tests, the similarities between treatments were evaluated using a one-way ANOVA with Tukey's post-hoc test to make multiple comparisons between the groups. A  $p$  value of less than 0.05 ( $p < 0.05$ ) was considered as statistically significant. ns: not significant, \*\*\*\* $p < 0.0001$ .

|                                          | Replicate<br>N° | Number of<br>cell<br>count/sample | Cell<br>polyP+ | % cell<br>polyP+ | Mean %<br>cell polyP+ | SD % cell<br>polyP+ |
|------------------------------------------|-----------------|-----------------------------------|----------------|------------------|-----------------------|---------------------|
| <b>Epifluorescence microscopy counts</b> | R1              | 1000                              | 188            | 18.8             | 10.5                  | 7.2                 |
|                                          | R2              | 1000                              | 66             | 6.6              |                       |                     |
|                                          | R3              | 1000                              | 60             | 6.0              |                       |                     |
| <b>FCM counts-DAPI labelling</b>         | R1              | 10355                             | 8714           | 84.2             | 82.8                  | 2.3                 |
|                                          | R2              | 10301                             | 8660           | 84.1             |                       |                     |
|                                          | R3              | 9203                              | 7381           | 80.2             |                       |                     |
| <b>FCM counts-JC-D7 labelling</b>        | R1              | 4436                              | 228            | 5.1              | 5.0                   | 0.1                 |
|                                          | R2              | 4713                              | 231            | 4,9              |                       |                     |
|                                          | R3              | 4449                              | 223            | 5,0              |                       |                     |

| Comparison test                     | Summary | Adjusted P Value |
|-------------------------------------|---------|------------------|
| Epifluorescence counts vs FCM DAPI  | ****    | <0.0001          |
| Epifluorescence counts vs FCM JC-D7 | ns      | 0.3429           |
| FCM DAPI vs FCM JC-D7               | ****    | <0.0001          |

**Table S23 : PolyP+ and polyP- cell counts after DAPI labelling for different bacterial strains.**

For each condition, three replicates were counted in FCM. The mean and SD are the average values of the percentage of polyP+ cells between replicates and the standard deviation of the mean, respectively.

| Tube Name                                | Replicate N° | PolyP -<br>#Events | % PolyP - | PolyP +<br>#Events | % PolyP + | Mean % cell<br>polyP+ | SD % cell<br>polyP+ |
|------------------------------------------|--------------|--------------------|-----------|--------------------|-----------|-----------------------|---------------------|
| <i>T. elongata</i>                       | R1           | 14061              | 78.5      | 3911               | 21.8      | 19.6                  | 2.4                 |
| <i>T. elongata</i>                       | R2           | 12851              | 83.3      | 2641               | 17.1      |                       |                     |
| <i>T. elongata</i>                       | R3           | 13329              | 80.6      | 3271               | 19.8      |                       |                     |
| <i>Flavobacterium sp.</i>                | R1           | 14021              | 100       | 8                  | 0.1       | 0.1                   | 0.1                 |
| <i>Flavobacterium sp.</i>                | R2           | 16433              | 99.9      | 10                 | 0.1       |                       |                     |
| <i>Flavobacterium sp.</i>                | R3           | 15249              | 100       | 5                  | 0         |                       |                     |
| <i>Acinetobacter lwoffii</i>             | R1           | 15922              | 99.9      | 14                 | 0.1       | 0.1                   | 0.0                 |
| <i>Acinetobacter lwoffii</i>             | R2           | 14569              | 99.9      | 12                 | 0.1       |                       |                     |
| <i>Acinetobacter lwoffii</i>             | R3           | 16564              | 99.9      | 9                  | 0.1       |                       |                     |
| <i>Pseudomonas sp.</i>                   | R1           | 15455              | 99.9      | 8                  | 0.1       | 0.0                   | 0.1                 |
| <i>Pseudomonas sp.</i>                   | R2           | 13806              | 100       | 6                  | 0         |                       |                     |
| <i>Pseudomonas sp.</i>                   | R3           | 15251              | 100       | 5                  | 0         |                       |                     |
| <i>Stenotrophomonas rhizophila</i>       | R1           | 11491              | 100       | 4                  | 0         | 0.0                   | 0.0                 |
| <i>Stenotrophomonas rhizophila</i>       | R2           | 13349              | 100       | 1                  | 0         |                       |                     |
| <i>Stenotrophomonas rhizophila</i>       | R3           | 12149              | 100       | 1                  | 0         |                       |                     |
| <i>Microbacterium hydrocarbonoxydans</i> | R1           | 13416              | 99.9      | 12                 | 0.1       | 0.1                   | 0.0                 |
| <i>Microbacterium hydrocarbonoxydans</i> | R2           | 12768              | 99.9      | 10                 | 0.1       |                       |                     |
| <i>Microbacterium hydrocarbonoxydans</i> | R3           | 13753              | 99.9      | 10                 | 0.1       |                       |                     |



**Table S24 : PolyP+ and polyP- cell counts after JC-D7 labelling for different bacterial strains.**

For each condition, three replicates were counted in FCM. The mean and SD are the average values of the percentage of polyP+ cells between replicates and the standard deviation of the mean, respectively.

| Tube Name                                | Replicate N° | PolyP - #Events | % PolyP - | PolyP + #Events | %PolyP + | Mean % cell polyP+ | SD % cell polyP+ |
|------------------------------------------|--------------|-----------------|-----------|-----------------|----------|--------------------|------------------|
| <i>T. elongata</i>                       | R1           | 11753           | 84.6      | 2228            | 16       |                    |                  |
| <i>T. elongata</i>                       | R2           | 10071           | 80.3      | 2540            | 20.3     | 17.5               | 2.4              |
| <i>T. elongata</i>                       | R3           | 11598           | 84.5      | 2222            | 16.2     |                    |                  |
| <i>Flavobacterium sp.</i>                | R1           | 15967           | 99.5      | 80              | 0.5      |                    |                  |
| <i>Flavobacterium sp.</i>                | R2           | 17611           | 99.5      | 88              | 0.5      | 0.5                | 0.0              |
| <i>Flavobacterium sp.</i>                | R3           | 17208           | 99.6      | 81              | 0.5      |                    |                  |
| <i>Acinetobacter lwoffii</i>             | R1           | 18014           | 99.9      | 20              | 0.1      |                    |                  |
| <i>Acinetobacter lwoffii</i>             | R2           | 18517           | 99.9      | 18              | 0.1      | 0.1                | 0.0              |
| <i>Acinetobacter lwoffii</i>             | R3           | 19230           | 99.9      | 16              | 0.1      |                    |                  |
| <i>Pseudomonas sp.</i>                   | R1           | 14598           | 99.8      | 31              | 0.2      |                    |                  |
| <i>Pseudomonas sp.</i>                   | R2           | 14241           | 99.8      | 30              | 0.2      | 0.2                | 0.0              |
| <i>Pseudomonas sp.</i>                   | R3           | 14434           | 99.8      | 27              | 0.2      |                    |                  |
| <i>Stenotrophomonas rhizophila</i>       | R1           | 15674           | 100       | 0               | 0        |                    |                  |
| <i>Stenotrophomonas rhizophila</i>       | R2           | 14514           | 100       | 1               | 0        | 0.0                | 0.0              |
| <i>Stenotrophomonas rhizophila</i>       | R3           | 14583           | 100       | 0               | 0        |                    |                  |
| <i>Microbacterium hydrocarbonoxydans</i> | R1           | 14950           | 99.9      | 15              | 0.1      |                    |                  |
| <i>Microbacterium hydrocarbonoxydans</i> | R2           | 15144           | 99.9      | 26              | 0.2      | 0.2                | 0.1              |
| <i>Microbacterium hydrocarbonoxydans</i> | R3           | 14469           | 99.8      | 32              | 0.2      |                    |                  |

**Table S25: Proportion of PolyP+ cells after JC-D7 labelling and FCM counting and concentrations of bioavailable orthophosphates (Olsen extraction method) in different soils from conventional and organic plots.**

|                                  | <b>SAMPLE<br/>CODE</b> | <b>BIOLOGICAL<br/>REPLICATE</b> | <b>POLYP+<br/>(%)</b> | <b>OLSEN<br/>PHOSPHORUS<br/>(µg/g SOIL)</b> |
|----------------------------------|------------------------|---------------------------------|-----------------------|---------------------------------------------|
| <b>CONVENTIONALLY<br/>FARMED</b> | Parcel 1               | R1                              | 6.6                   | 116                                         |
|                                  | Parcel 1               | R2                              | 4.4                   | 117                                         |
|                                  | Parcel 1               | R3                              | 3.7                   | 112                                         |
|                                  | Parcel 2               | R1                              | 4.9                   | 39.9                                        |
|                                  | Parcel 2               | R2                              | 3.6                   | 39.2                                        |
|                                  | Parcel 2               | R3                              | 3.1                   | 33.3                                        |
|                                  | Parcel 3               | R1                              | 2.2                   | 60.7                                        |
|                                  | Parcel 3               | R2                              | 3.1                   | 63.3                                        |
|                                  | Parcel 3               | R3                              | 2.1                   | 72                                          |
| <b>ORGANICALLY FARMED</b>        | Parcel 4               | R1                              | 0.5                   | 23.8                                        |
|                                  | Parcel 4               | R2                              |                       | 27.2                                        |
|                                  | Parcel 4               | R3                              | 0.4                   | 42.9                                        |
|                                  | Parcel 5               | R1                              | 0.2                   | 30.7                                        |
|                                  | Parcel 5               | R2                              | 0.4                   | 35.8                                        |
|                                  | Parcel 5               | R3                              | 0.3                   | 33.6                                        |
|                                  | Parcel 6               | R1                              | 0.5                   | 40.7                                        |
|                                  | Parcel 6               | R2                              |                       | 37.7                                        |
|                                  | Parcel 6               | R3                              | 0.7                   | 41.9                                        |

*Note : Olsen phosphorus was not available for the replicate 2 (R2) of parcel 4 and 6.*

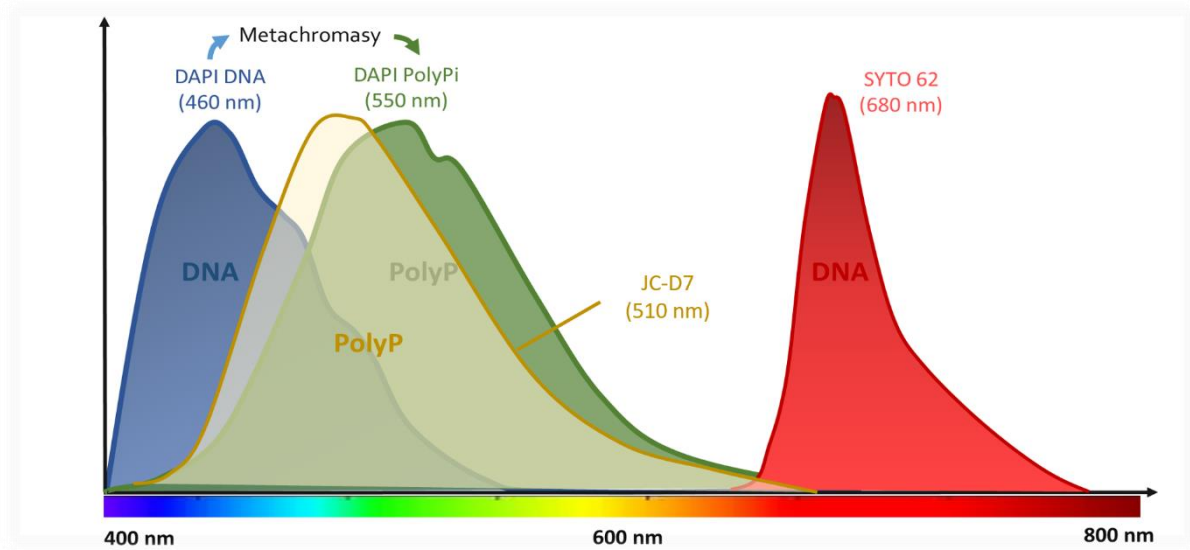

**Figure S1 : Emission curves and compatibility of fluorochromes (DAPI, JC-D7, SYTO®62) used for flow cytometry and epifluorescence microscopy analyses.**

DAPI is a fluorescent dye with metachromatic properties. DAPI binds strongly to DNA and the DAPI-DNA complex fluoresces blue, with maximum emission at 460 nm. DAPI also forms complexes with polyP that emit a yellow-green fluorescence, with maximum emission at 550 nm

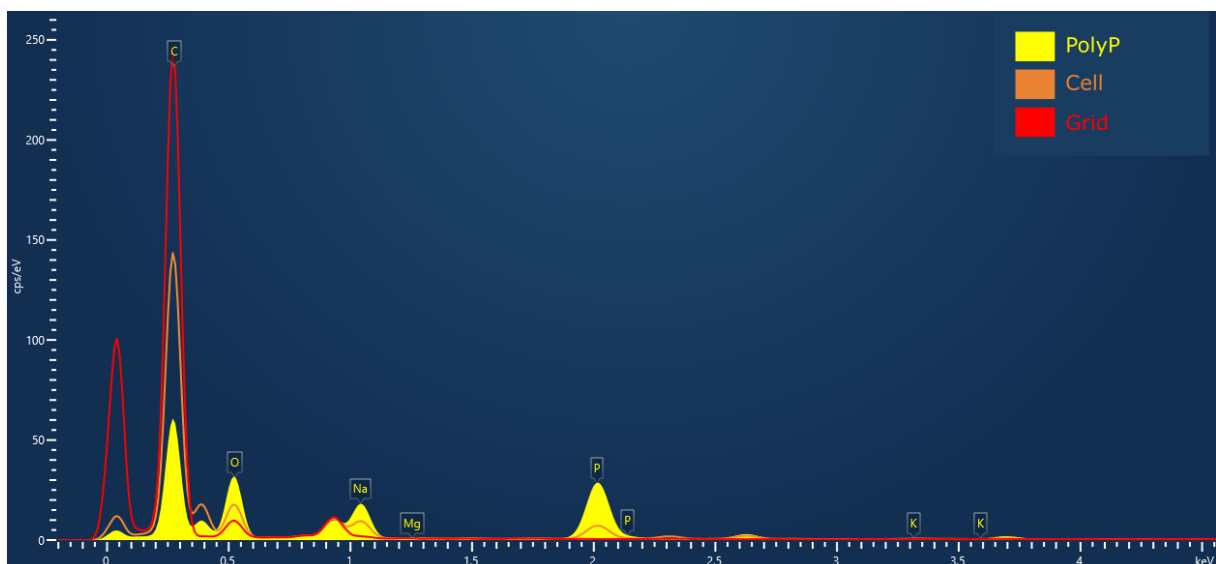

**Figure S2 : Representative energy dispersive X-ray (EDX) spectra of polyP granule in *Tetrasphaera elongata* (polyP in yellow) compared to EDX spectra outside polyP granule (cell in orange) and outside the cell (grid in red).**

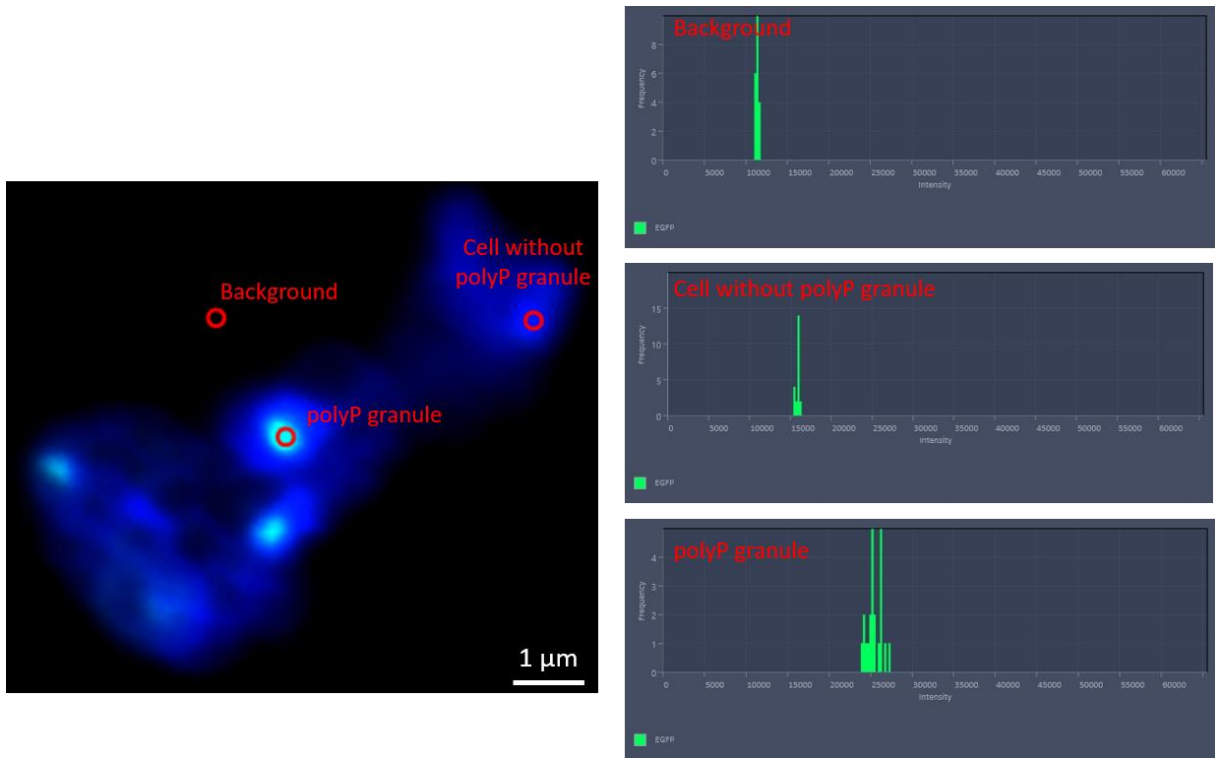

**Figure S3 : Green fluorescence values from a photograph of a *T. elongata* culture sample observed by epifluorescence microscopy.**

On the left is a photograph of *T. elongata* cells showing the background, a cell without polyP granules and a cell with polyP granules. On the right, histograms show the green intensity values corresponding to the background, the cell without polyP granule and with polyP granule.

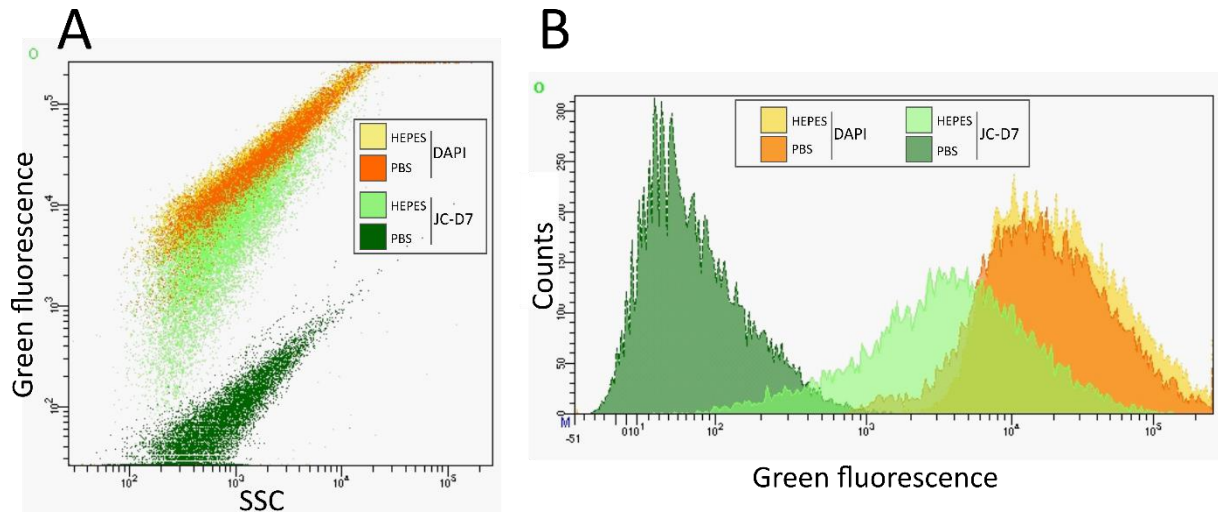

**Figure S4 : Overlays of cytograms obtained for *T. elongata* after labelling polyP with JC-D7 or DAPI in HEPES or PBS buffer.**

(A) Fluorescence intensity after labelling *T. elongata* with DAPI or JC-D7 (green fluorescence) in HEPES or PBS buffer *versus* side scatter (SSC). (B) Number of events (counts) *versus* fluorescence intensity after labelling *T. elongata* with DAPI or JC-D7 (green fluorescence) in HEPES or PBS buffer.
